# Supplementary material for: Cardiomyocyte-specific role of miR-24 in promoting cell survival
Source: PubMed Central journal article supplement (PMC4288354; doi:10.1111/jcmm.12393), 2014-10-29
Supplement: jcmm0019-0103-sd1.pdf [file jcmm0019-0103-sd1.pdf]

Supplementary Figure 1



## Supplementary Figure 2



Supplementary Figure 3



Supplementary Figure 4
